# Supplementary material for: Novel genetically-humanized mouse model established to evaluate efficacy of therapeutic agents to human interleukin-6 receptor
Source: PubMed Central journal article supplement — Sci Rep. 2013 Feb 1;3:1196. doi: 10.1038/srep01196 (PMC3561642; doi:10.1038/srep01196), 2013-02-01
Supplement: srep01196-s1.pdf [file srep01196-s1.pdf]

Supplemental Information for

**Novel genetically-humanized mouse model established to evaluate efficacy of therapeutic agents to human interleukin-6 receptor**

Otoya Ueda<sup>1</sup>, Hiromi Tateishi<sup>2</sup>, Yoshinobu Higuchi<sup>1</sup>, Etsuko Fujii<sup>1</sup>, Atsuhiko Kato<sup>1</sup>, Yosuke Kawase<sup>2</sup>, Naoko A. Wada<sup>1,2</sup>, Takanori Tachibe<sup>2</sup>, Mami Kakefuda<sup>2</sup>, Chisato Goto<sup>2</sup>, Makoto Kawaharada<sup>2</sup>, Shin Shimaoka<sup>1</sup>, Kunihiro Hattori<sup>1</sup> and Kou-ichi Jishage<sup>1\*</sup>

<sup>1</sup>Chugai Pharmaceutical Co. Ltd., Fuji-Gotemba Research Laboratories, 1-135, Komakado, Gotemba, Shizuoka, Japan.

<sup>2</sup> Chugai Research Institute for Medical Science Inc. 1-135, Komakado, Gotemba, Shizuoka, Japan.

\*To whom correspondence should be addressed:

[jishagekui@chugai-pharm.co.jp](mailto:jishagekui@chugai-pharm.co.jp)

Supplementary information includes

Supplementary Figure S1

**Supplementary Figure S1: Marked and specific prevention of splenomegaly in humanized Castleman's disease mouse model with the treatment of hIL6R-specific neutralizing antibody.**

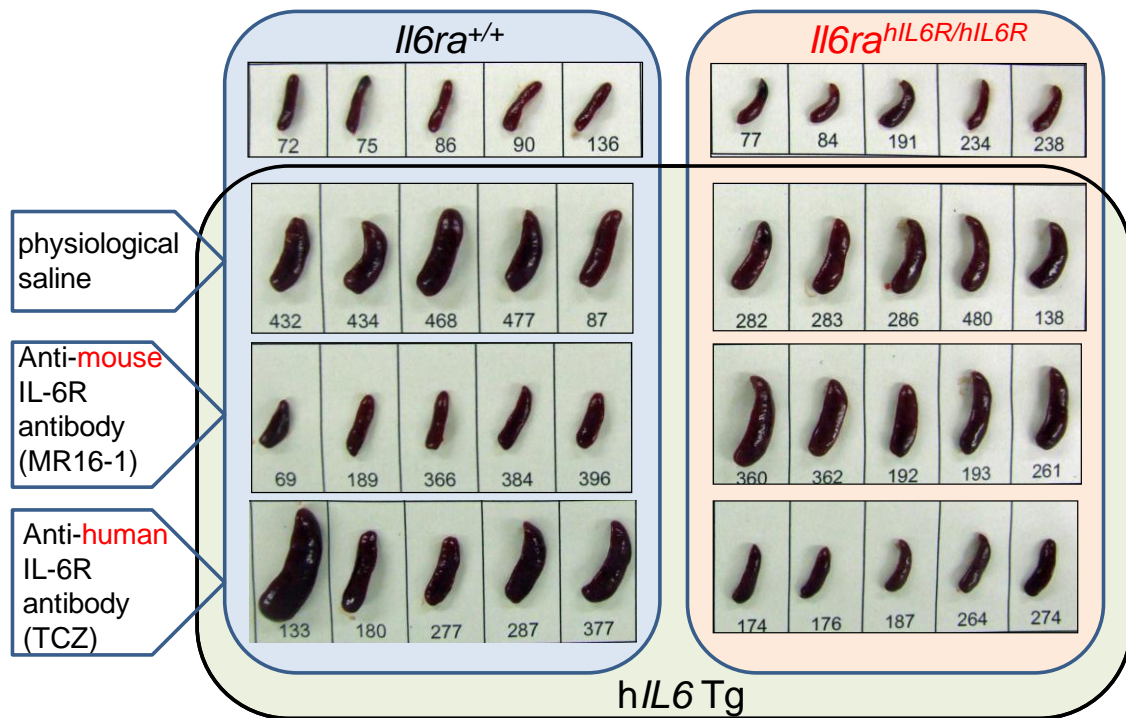

**Supplementary Figure S1.** Both *Il6ra*<sup>hIL6R/hIL6R</sup>-*hIL6* transgenic mice and *Il6ra*<sup>+/+</sup>-*hIL6* transgenic mice were treated with physiological saline, the anti-mouse *Il6ra* antibody, MR16-1, or the anti-human *IL6R* antibody, tocilizumab (TCZ). Number at the bottom of each spleen denotes the animal ID number. Marked and specific prevention of splenomegaly was observed in *Il6ra*<sup>hIL6R/hIL6R</sup>-*hIL6* transgenic mice (animal ID#174, 176, 187, 264 and 274) with the treatment of TCZ, but not with MR16-1 (#360, 362, 192, 193 and 261). In contrast, in *Il6ra*<sup>+/+</sup>-*hIL6* transgenic mice TCZ treatment does not

show preventive effects on the splenomegaly (#133, 180, 277, 287 and 377), whereas

MR16-1 markedly prevented splenomegaly (#69, 189, 366, 384 and 396).
